# Supplementary material for: WRN Promoter CpG Island Hypermethylation Does Not Predict More Favorable Outcomes for Patients with Metastatic Colorectal Cancer Treated with Irinotecan-Based Therapy
Source: Oxford University Press journal article supplement (doi:10.1158/1078-0432.ccr-15-2703), 2016-04-28
Supplement: 10780432ccr152703-sup-156707_2_supp_3412533_d4d2zh.xlsx [file 10780432ccr152703-sup-156707_2_supp_3412533_d4d2zh.xlsx]

## Sheet: Sheet1
	Supplementary table 4: Multivariate Cox regression analysis showing the relationship between different covariates,
	including an interaction between WRN methylation and treatment arm, and progression free survival
	Covariate	HR	95% CI	p-value*
	treatment arm	0.396918	0.25-0.63	0.000172
	WRN methylation status	0.259608	0.08-0.83	0.023036
	previous adjuvant therapy	1.82985	1.12-2.98	0.015463
	serum LDH	2.08289	1.37-3.16	0.000548
	WHO performance status	1.16953	0.85-1.62	0.344722
	gender	0.669044	0.44-1.02	0.059386
	age	0.990269	0.97-1.01	0.374663
	location of metastases	1.18772	0.84-1.68	0.331993
	MSI status	0.534958	0.13-2.21	0.386701
	BRAF mutational status	3.39994	1.3-8.91	0.01284
	mucinous differentiation	1.66511	0.81-3.42	0.1656
	interaction of treatment arm and WRN methylation status	2.35687	1.13-4.94	0.023072
	Analysis based on 136 samples, of which 133 events
	CI, confidence interval; HR, hazard ratio; WRN, Werner gene; LDH, Lactate dehydrogenase; WHO, World Health Organisation
	*Wald test
